# Supplementary material
Source: PubMed Central journal article supplement (PMC3148848)
Supplement: NIHMS310703-supplement-1_si_001.pdf [file NIHMS310703-supplement-1_si_001.pdf]

## Supporting Information

### **Structure-Based Design, Synthesis, and Biological Evaluation of a Series of Novel and Reversible Inhibitors for the Severe Acute Respiratory Syndrome-Coronavirus Papain-Like Protease**

*Arun K. Ghosh, \*Jun Takayama, Yoann Aubin, Kiira Ratia, Rima Chaudhuri, Yahira Baez, Katrina Sleeman, Melissa Coughlin, Daniel B. Nichols, Debbie C. Mulhearn, Bellur S. Prabhakar, Susan C. Baker, Michael E. Johnson, and Andrew D. Mesecar*

- S2. HPLC data of inhibitors.
- S3. HRMS data of inhibitors.
- S4. **Figure 1.** Stereoview of the X-ray structure of inhibitor **24**-bound SARS-CoV PLpro.; **Figure S2.** Inhibitor **24** (cyan) induces loop closure.

**Purity.** HPLC system was used Agilent 1100 series. Column and flow rate were employed XDB-C18 5 $\mu$ m 4.6 x 150mm and 1.5 mL/min. **Solvent system A** = linear gradient from 25% acetonitrile, 75% water to 90% acetonitrile, 10% water in 15 min. **Solvent system B** = linear gradient from 30% methanol, 70% water to 100% methanol in 18 min. **Solvent system C** = linear gradient from 20% acetonitrile, 80% 25mM NH<sub>4</sub>OAc in water (pH 4.8) to 80% acetonitrile, 20% 25mM NH<sub>4</sub>OAc in water (pH 4.8) in 15 min.

**Table S1.** Purity of inhibitors

| <b>Inhibitor</b> | <b>Solvent system</b> | <b>Retention Time (min)</b> | <b>Purity (%)</b> | <b>Column</b>                 |
|------------------|-----------------------|-----------------------------|-------------------|-------------------------------|
| <b>5a</b>        | A                     | 10.9                        | 99.3              | XDB-C18 5 $\mu$ m 4.6 x 150mm |
| <b>5b</b>        | A                     | 10.8                        | 99.7              | XDB-C18 5 $\mu$ m 4.6 x 150mm |
| <b>5c</b>        | A                     | 11.0                        | 98.3              | XDB-C18 5 $\mu$ m 4.6 x 150mm |
| <b>5d</b>        | A                     | 10.2                        | 99.6              | XDB-C18 5 $\mu$ m 4.6 x 150mm |
| <b>5e</b>        | A                     | 9.9                         | 98.0              | XDB-C18 5 $\mu$ m 4.6 x 150mm |
| <b>5f</b>        | A                     | 10.7                        | 96.7              | XDB-C18 5 $\mu$ m 4.6 x 150mm |
| <b>5g</b>        | A                     | 11.6                        | 98.7              | XDB-C18 5 $\mu$ m 4.6 x 150mm |
| <b>5h</b>        | A                     | 10.5                        | 99.7              | XDB-C18 5 $\mu$ m 4.6 x 150mm |
| <b>5i</b>        | A                     | 10.7                        | 98.5              | XDB-C18 5 $\mu$ m 4.6 x 150mm |
| <b>8</b>         | A                     | 11.5                        | 96.5              | XDB-C18 5 $\mu$ m 4.6 x 150mm |
| <b>9</b>         | A                     | 7.9                         | 99.3              | XDB-C18 5 $\mu$ m 4.6 x 150mm |
| <b>14</b>        | A                     | 11.3                        | 99.8              | XDB-C18 5 $\mu$ m 4.6 x 150mm |
| <b>17</b>        | A                     | 12.5                        | 99.7              | XDB-C18 5 $\mu$ m 4.6 x 150mm |
| <b>21</b>        | A                     | 12.4                        | 99.9              | XDB-C18 5 $\mu$ m 4.6 x 150mm |
| <b>23</b>        | A                     | 7.8                         | 99.3              | XDB-C18 5 $\mu$ m 4.6 x 150mm |
| <b>24</b>        | A                     | 8.1                         | 99.2              | XDB-C18 5 $\mu$ m 4.6 x 150mm |
| <b>25</b>        | A                     | 7.7                         | 98.9              | XDB-C18 5 $\mu$ m 4.6 x 150mm |
| <b>29</b>        | A                     | 8.6                         | 98.2              | XDB-C18 5 $\mu$ m 4.6 x 150mm |

|           |   |      |      |                               |
|-----------|---|------|------|-------------------------------|
| <b>32</b> | B | 13.1 | 96.0 | XDB-C18 5 $\mu$ m 4.6 x 150mm |
| <b>33</b> | B | 11.2 | 99.9 | XDB-C18 5 $\mu$ m 4.6 x 150mm |
| <b>40</b> | B | 10.8 | 95.3 | XDB-C18 5 $\mu$ m 4.6 x 150mm |
| <b>47</b> | A | 12.9 | 99.8 | XDB-C18 5 $\mu$ m 4.6 x 150mm |
| <b>49</b> | C | 5.0  | 98.6 | XDB-C18 5 $\mu$ m 4.6 x 150mm |
| <b>2</b>  | C | 4.7  | 98.3 | XDB-C18 5 $\mu$ m 4.6 x 150mm |

(Flow rate 1.5 mL/min)

**Table S2.** HRMS for inhibitors

|           |                                                                                                                                       |
|-----------|---------------------------------------------------------------------------------------------------------------------------------------|
| <b>5a</b> | HRMS ( <i>m/z</i> ) calcd for C <sub>20</sub> H <sub>19</sub> NO [M] <sup>+</sup> 289.1467, found 289.1468                            |
| <b>5b</b> | HRMS ( <i>m/z</i> ) calcd for C <sub>20</sub> H <sub>19</sub> NO [M] <sup>+</sup> 289.1467, found 289.1469                            |
| <b>5c</b> | HRMS ( <i>m/z</i> ) calcd for C <sub>20</sub> H <sub>19</sub> NO <sub>2</sub> [M] <sup>+</sup> 305.1416, found 305.1414               |
| <b>5d</b> | HRMS ( <i>m/z</i> ) calcd for C <sub>20</sub> H <sub>19</sub> NO <sub>2</sub> [M] <sup>+</sup> 305.1416, found 305.1417               |
| <b>5e</b> | HRMS ( <i>m/z</i> ) calcd for C <sub>20</sub> H <sub>19</sub> NO <sub>2</sub> [M] <sup>+</sup> 305.1416, found 305.1419               |
| <b>5f</b> | HRMS ( <i>m/z</i> ) calcd for C <sub>21</sub> H <sub>21</sub> NO [M] <sup>+</sup> 303.1623, found 303.1624                            |
| <b>5g</b> | HRMS ( <i>m/z</i> ) calcd for C <sub>19</sub> H <sub>17</sub> NO <sub>2</sub> [M] <sup>+</sup> 291.1259, found 291.1261               |
| <b>5h</b> | HRMS ( <i>m/z</i> ) calcd for C <sub>20</sub> H <sub>19</sub> NO [M] <sup>+</sup> 289.1467, found 289.1468                            |
| <b>5i</b> | HRMS ( <i>m/z</i> ) calcd for C <sub>20</sub> H <sub>18</sub> N <sub>2</sub> O <sub>3</sub> [M] <sup>+</sup> 334.1317, found 334.1323 |
| <b>8</b>  | HRMS ( <i>m/z</i> ) calcd for C <sub>24</sub> H <sub>26</sub> N <sub>2</sub> O <sub>3</sub> [M] <sup>+</sup> 390.1943, found 390.1942 |
| <b>9</b>  | HRMS ( <i>m/z</i> ) calcd for C <sub>19</sub> H <sub>18</sub> N <sub>2</sub> O [M] <sup>+</sup> 290.1419, found 290.1424              |
| <b>14</b> | HRMS ( <i>m/z</i> ) calcd for C <sub>21</sub> H <sub>21</sub> NO [M] <sup>+</sup> 303.1623, found 303.1624                            |
| <b>17</b> | HRMS ( <i>m/z</i> ) calcd for C <sub>25</sub> H <sub>21</sub> NO [M] <sup>+</sup> 351.1623, found 351.1618                            |
| <b>21</b> | HRMS ( <i>m/z</i> ) calcd for C <sub>21</sub> H <sub>21</sub> NO [M] <sup>+</sup> 303.1623, found 303.1627                            |
| <b>23</b> | HRMS ( <i>m/z</i> ) calcd for C <sub>19</sub> H <sub>18</sub> N <sub>2</sub> O [M] <sup>+</sup> 290.1419, found 290.1422              |
| <b>25</b> | HRMS ( <i>m/z</i> ) calcd for C <sub>22</sub> H <sub>22</sub> N <sub>2</sub> O <sub>2</sub> [M] <sup>+</sup> 346.1681, found 346.1682 |
| <b>29</b> | HRMS ( <i>m/z</i> ) calcd for C <sub>21</sub> H <sub>22</sub> N <sub>2</sub> O [M] <sup>+</sup> 318.1732, found 318.1729              |
| <b>32</b> | HRMS ( <i>m/z</i> ) calcd for C <sub>20</sub> H <sub>18</sub> INONa [M+Na] <sup>+</sup> 438.0331, found 438.0333                      |
| <b>33</b> | HRMS ( <i>m/z</i> ) calcd for C <sub>21</sub> H <sub>18</sub> N <sub>2</sub> O [M] <sup>+</sup> 314.1419, found 314.1424              |
| <b>40</b> | HRMS ( <i>m/z</i> ) calcd for C <sub>21</sub> H <sub>22</sub> N <sub>2</sub> O <sub>2</sub> [M] <sup>+</sup> 334.1681, found 334.1679 |
| <b>47</b> | HRMS ( <i>m/z</i> ) calcd for C <sub>26</sub> H <sub>30</sub> N <sub>2</sub> O <sub>3</sub> [M] <sup>+</sup> 418.2256, found 418.2252 |
| <b>49</b> | HRMS ( <i>m/z</i> ) calcd for C <sub>22</sub> H <sub>24</sub> N <sub>2</sub> O [M] <sup>+</sup> 332.1889, found 332.1891              |
| <b>2</b>  | HRMS ( <i>m/z</i> ) calcd for C <sub>21</sub> H <sub>22</sub> N <sub>2</sub> O [M] <sup>+</sup> 318.1732, found 318.1734              |

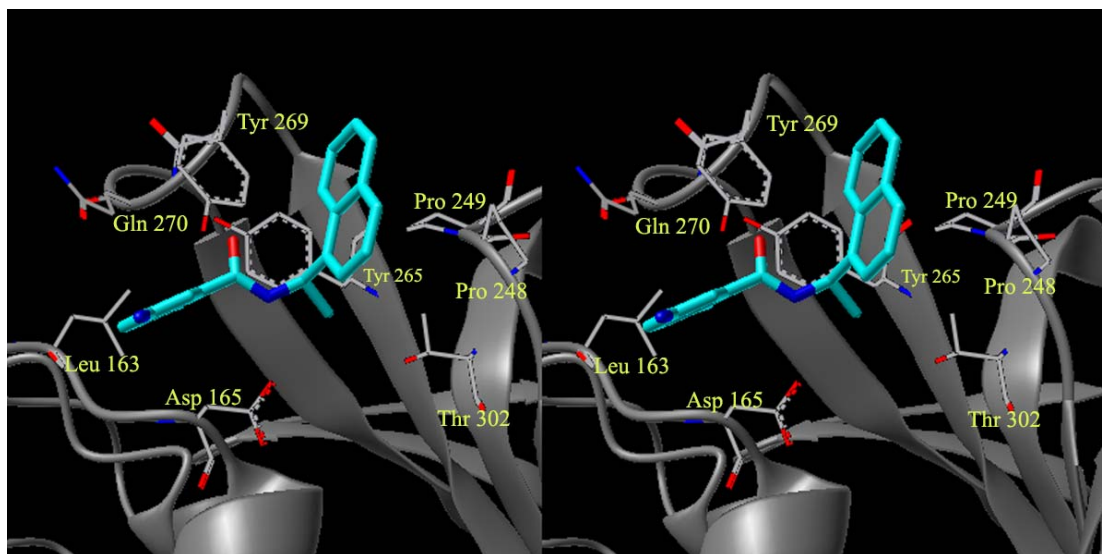

**Figure 1.** Stereoview of the X-ray structure of inhibitor **24**-bound SARS-CoV PLpro. Interactions of inhibitor **24** (cyan) with the surrounding residues within the S3 and S4 subsites are shown. For clarity, no water molecules are shown here. Critical waters are shown and discussed in conjunction with Figure 2.

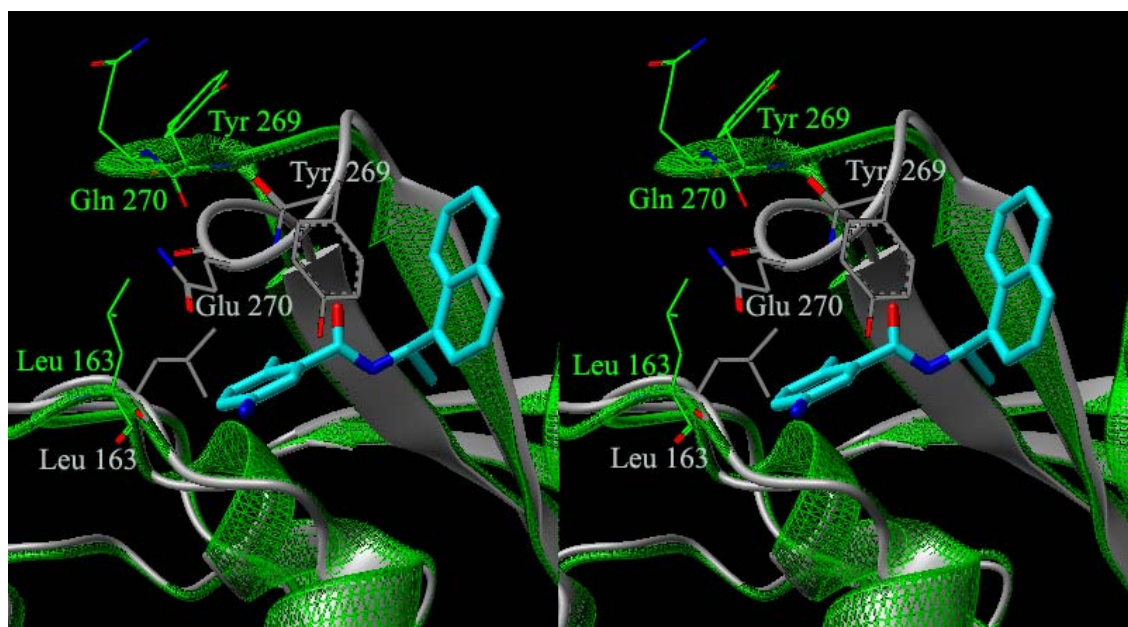

**Figure 22.** Inhibitor **24** (cyan) induces loop closure. A mesh representation of apo PLpro (green) superimposed on the ribbon diagram of the X-ray of inhibitor-bound enzyme (in grey). For clarity, no water molecules are shown here. Critical waters are shown and discussed in conjunction with Figure 2.
